# Supplementary material for: Quantitative Expression and Co-Localization of Wnt Signalling Related Proteins in Feline Squamous Cell Carcinoma
Source: PubMed Central journal article supplement (PMC4999089; doi:10.1371/journal.pone.0161103), 2016-08-25

Supplementary Figure S1 Fig

A

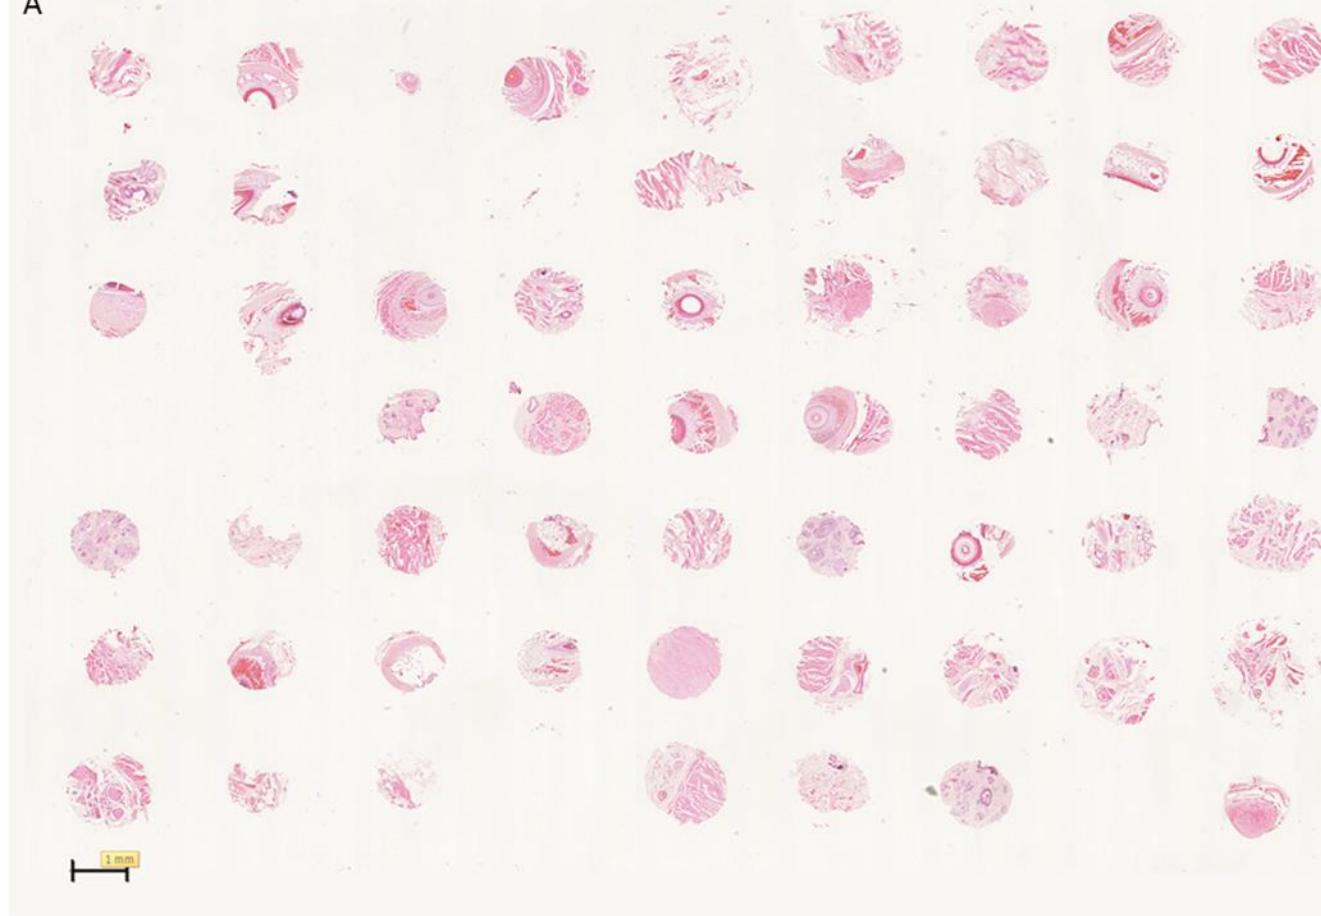

Supplementary Figure S1 Fig

B

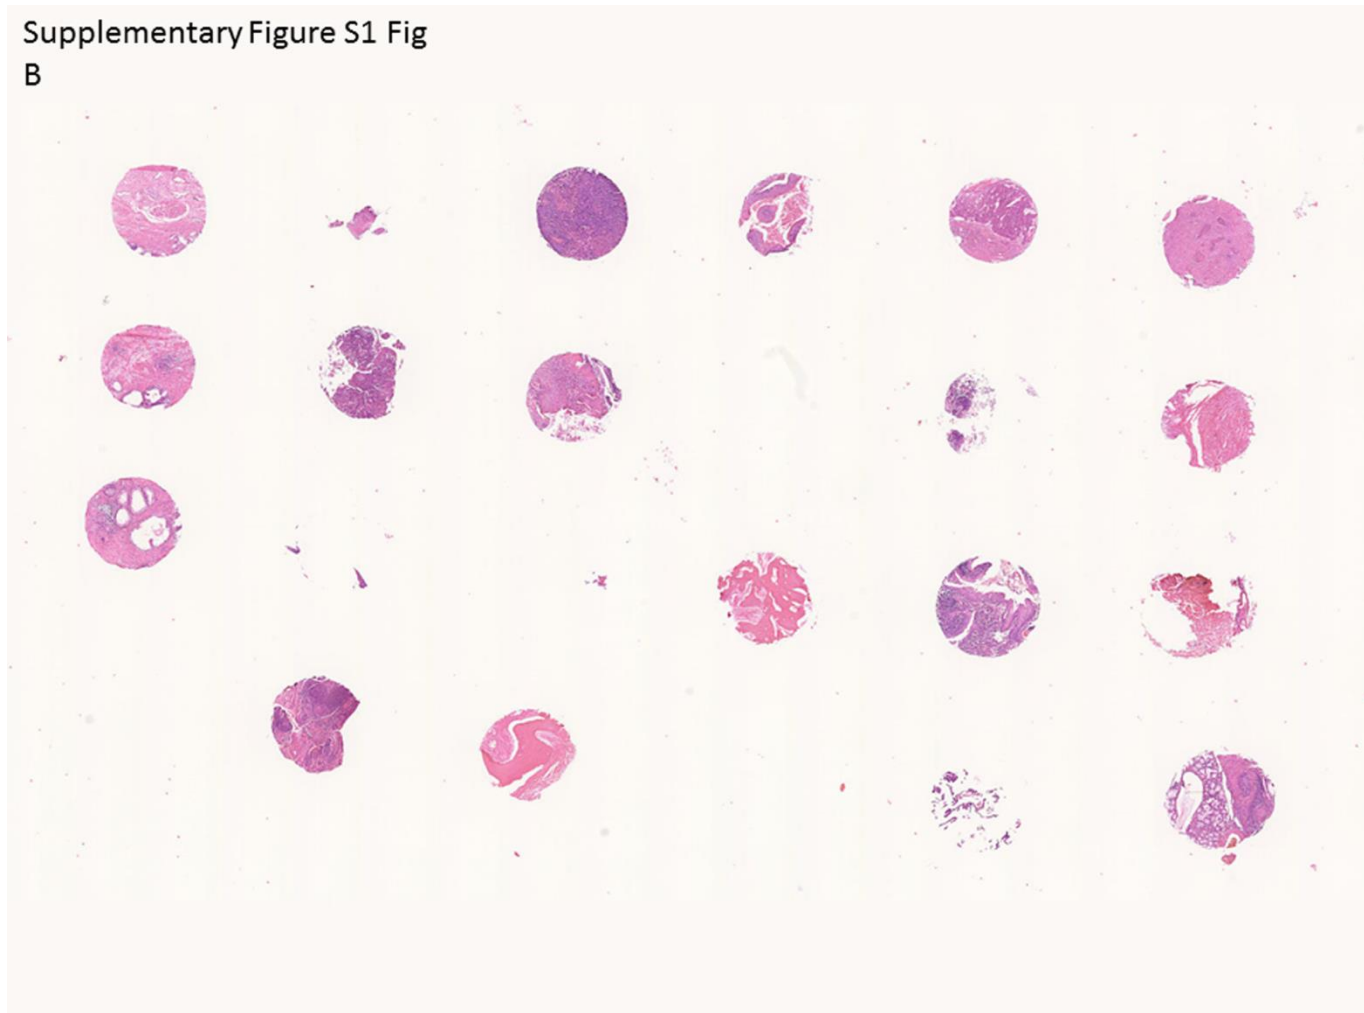

Supplementary Figure S1 Fig

C

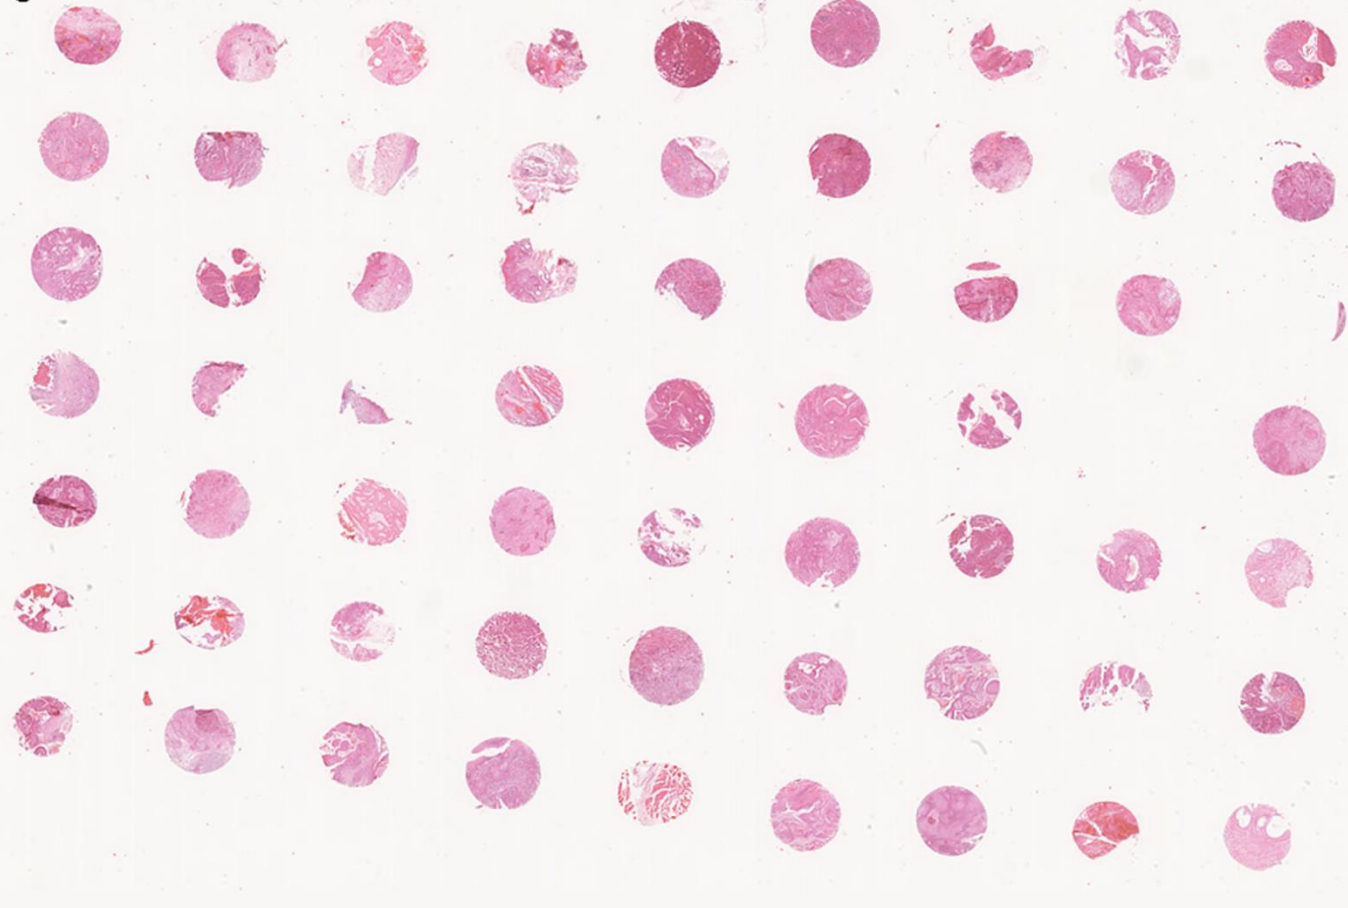

Supplement: pone.0161103.s001.pdf [file pone.0161103.s001.pdf]
